# Supplementary material for: Biobased UV-curable coatings based on itaconic acid
Source: Springer Nature journal article supplement (doi:10.1007/s11998-017-9949-y), 2017-06-06
Supplement: MOESM1 [file 12341924]

**Supporting information**

# Biobased UV-curable coatings based on itaconic acid

Sara Brännström, Eva Malmström, Mats Johansson*

KTH Royal Institute of Technology, School of Chemical Sciences and Engineering, Department of Fibre and Polymer Technology, SE-100 44 Stockholm, Sweden

*Correspondence to: [matskg@kth.se](mailto:matskg@kth.se)

Figure S1. FTIR of the synthesized polyesters PIB to different molecular weights.

**Figure S2:** FTIR of the synthesized polyesters PISB with different ratios of IA and SA.


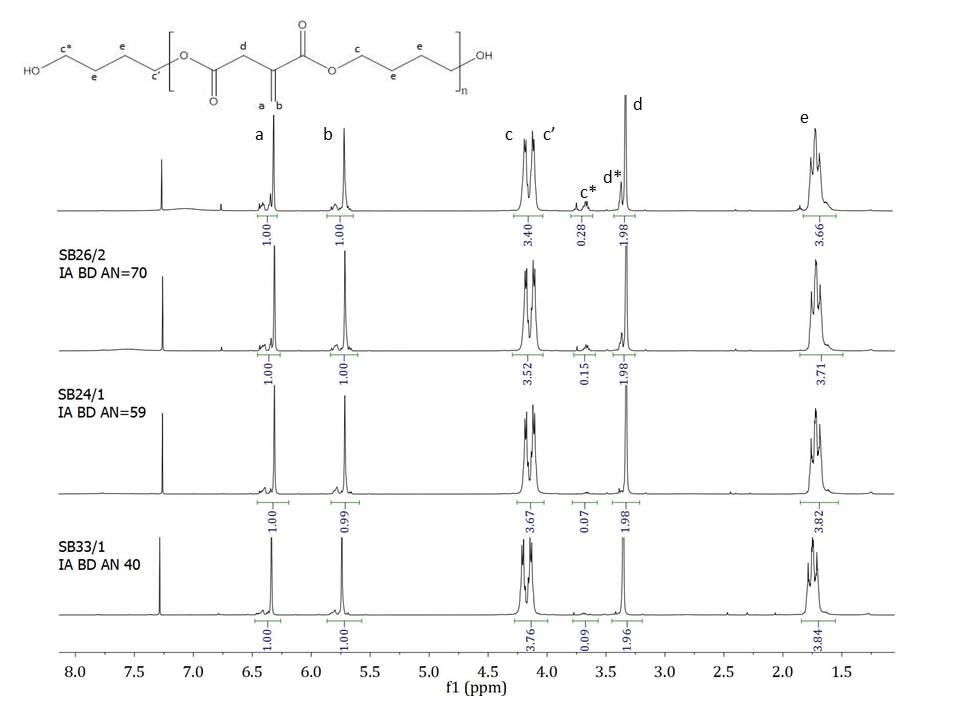


PIB-90

PIB-70

PIB-60

PIB-40

**Figure S3:** 1H-NMR spectra of PIB


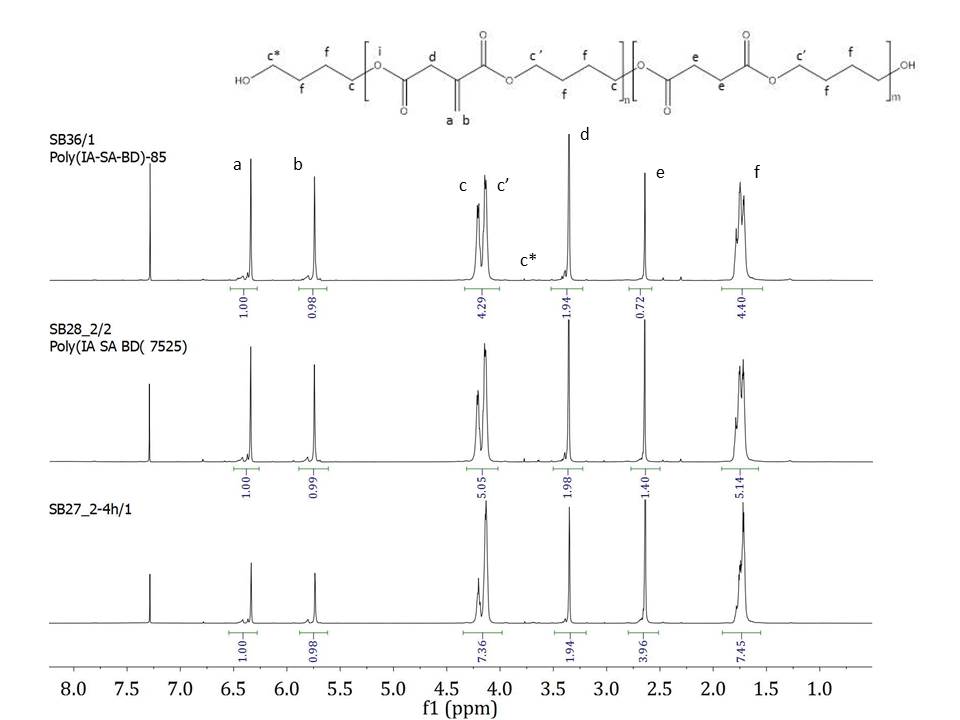


PISB-85

PISB-75

PISB-50

**Figure S4:** 1H-NMR spectra of PIB and PISB


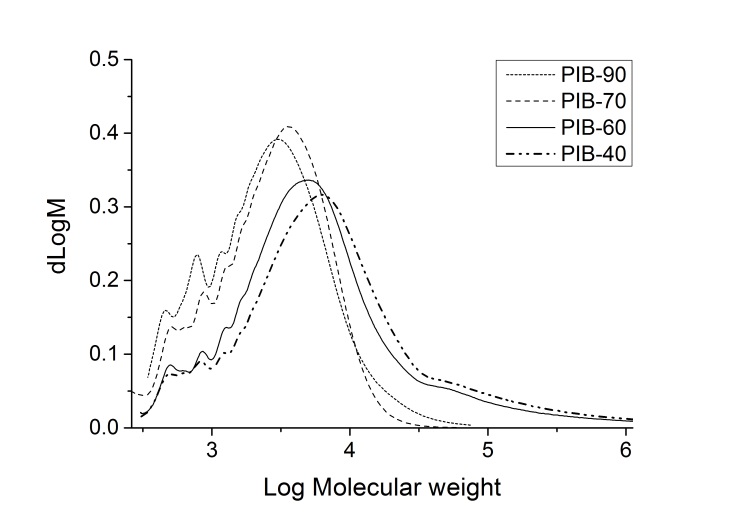

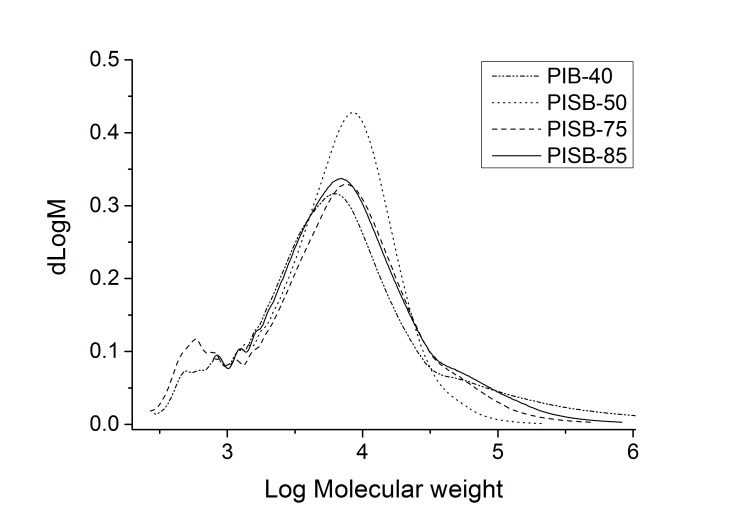


Figure S5. SEC traces for of molecular weight distributions for the synthesized polyesters, analyzed by means of THF-SEC.

The theoretical molecular weights have been calculated from Carothers equation accordingly:

Where *r* is the stoichiometric imbalance:

And *p* is the extent of the reaction, calculated from the concentration of the limiting reactant, in this case carboxylic acid:

As an example, the theoretical molecular weight of PIB-40 is calculated below. The total mass of the sample was 30 g, the final acid number was 40 mg/g and the stoichiometric imbalance was 1 [Itaconic acid] : 1.2 [Butane diol] and the starting amount of itaconic acid was 0.126 mol.

All the theoretical molecular weights have been calculated and are presented in Table S1.

**Table S1.** Theoretical molecular weights calculated for the polyesters.

| **Polyester** | **Itaconic acid** | **Succinic acid** | **1,4-Butanediol** | **Acid number**  **[mg/g]** | **Theoretical Xn** | **Theoretical molecular weight**  **[g/mol]** |
| --- | --- | --- | --- | --- | --- | --- |
| PIB-90 | 1 | 0 | 1.2 | 90 | 3.8 | 430 |
| PIB-70 | 1 | 0 | 1.2 | 70 | 4.4 | 500 |
| PIB-60 | 1 | 0 | 1.2 | 60 | 4.8 | 540 |
| PIB-40 | 1 | 0 | 1.2 | 40 | 6.0 | 680 |
| PISB-85 | 0.85 | 0.15 | 1.2 | 40 | 5.9 | 670 |
| PISB-75 | 0.75 | 0.25 | 1.2 | 40 | 5.9 | 680 |
| PISB-50 | 0.5 | 0.75 | 1.2 | 40 | 6.0 | 680 |
